# Supplementary material for: Underestimated Factors Regarding the Use of Technology in Daily Practice of Long-Term Care: Qualitative Study Among Health Care Professionals
Source: PubMed Central journal article supplement (PMC10413233; doi:10.2196/41032), 2023-07-26
Supplement: nursing_v6i1e41032_app1.pdf [file nursing_v6i1e41032_app1.pdf]

## Appendix 1: Statement cards used in the focus group

| Healthcare technology and me                                                                                                                          |                                                                                                                                          |
|-------------------------------------------------------------------------------------------------------------------------------------------------------|------------------------------------------------------------------------------------------------------------------------------------------|
| I use social and other media to discover or share experiences of using of healthcare technology.                                                      | I set a good example to others with my approach to using healthcare technology.                                                          |
| I consciously assess how well a certain aspect of healthcare technology has worked for me.                                                            | I am aware of the possibilities, strong and weak points of the healthcare technologies which I use.                                      |
| I experiment with new healthcare technology.                                                                                                          | I have every confidence in the healthcare technology which I use.                                                                        |
| I am familiar with healthcare technology and I can explain its added value.                                                                           | I have attended a conference on healthcare technology.                                                                                   |
| I follow developments in the field of healthcare technology.                                                                                          |                                                                                                                                          |
| Healthcare technology, the patient and me                                                                                                             |                                                                                                                                          |
| I work in collaboration with healthcare users to improve healthcare technology.                                                                       | If a health care user is using a form of healthcare technology I make sure that I understand how it works and how I can use it properly. |
| I can refer a care user to reputable websites which offer information on their illness, condition or treatment.                                       | I can explain to a care user how a particular healthcare technology will benefit them.                                                   |
| I look for and use the available healthcare technology to meet the individual needs of those requiring health care.                                   | I estimate for the individual care user whether communication through healthcare technology is suitable for them.                        |
| I can use data obtained from measuring equipment or digital health records for treatment of a care user.                                              | I encourage care users and informal carers to use healthcare technology.                                                                 |
| Healthcare technology, the organization and me                                                                                                        |                                                                                                                                          |
| In my team, we encourage each other to use healthcare technology as part of the care we provide..                                                     | I work in collaboration with colleagues to improve healthcare technology.                                                                |
| I take part in online discussions to share experiences with other healthcare professionals.                                                           | I use my knowledge of healthcare technology to help my colleagues.                                                                       |
| I try to find appropriate practical examples of healthcare technology when my own team cannot find a solution to a problem.                           | I know someone in my team who is good at using healthcare technology and who can answer my questions.                                    |
| I am aware of the security measures taken by my organization relating to healthcare technology and I stick to these rules.                            | I use healthcare technology to improve the efficiency of my organization.                                                                |
| Facilitating conditions                                                                                                                               |                                                                                                                                          |
| During training courses and training programs, we regularly discuss how healthcare technology can be used to improve care for patients.               | My supervisor regularly discusses with me how to use healthcare technology and implement it in our care package.                         |
| My organization has a clear policy on healthcare technology and I know what we want to achieve in this area.                                          | The use of healthcare technology is regularly discussed during our team meetings.                                                        |
| I know who I can ask for advice if our team wants to introduce new healthcare technology for care users or for ourselves.                             | My supervisor leads by example in using healthcare technology.                                                                           |
| I am given enough time to learn how to use new healthcare technology, my questions are answered and my complaints or suggestions are taken seriously. | My organization provides enough money and time for training its staff to keep up-to-date with advancements in healthcare technology.     |
| My organization provides enough instructions, training videos and manuals that are easy to understand and help me to use healthcare technology.       | If healthcare technology does not work the problem is solved quickly.                                                                    |
| I feel that I am given enough room to experiment with healthcare technology.                                                                          | There are colleagues available for technical support who can answer my questions and provide me with help.                               |
